# Supplementary material for: Size and surface-energy dependence of the adsorption/desorption equilibrium in ethanol electro-oxidation by Pd-nanoparticles. Theory and experiment
Source: Royal Society of Chemistry journal article supplement (doi:10.1039/d1ra08742h), 2022-01-01
Supplement: d1ra08742h1.pdf [file d1ra08742h1.pdf]

**Supplementary Information**

**Size and surface-energy dependence of the  
adsorption/desorption equilibrium in ethanol electro-oxidation  
by Pd-nanoparticles. Theory and experiment.**

J. Maya-Cornejo<sup>a\*</sup>, S. I. Hernández<sup>a</sup>, Miriam Estévez<sup>b</sup> and I. Santamaría-Holek<sup>a\*</sup>

<sup>a</sup> Unidad Multidisciplinaria de Docencia e Investigación-Juriquilla, Facultad de Ciencias, Universidad Nacional Autónoma de México, Juriquilla, Querétaro 76230, Mexico.

<sup>b</sup> Centro de Física Aplicada y Tecnología Avanzada, Universidad Nacional Autónoma de México, Boulevard Juriquilla 3001, 76230 Santiago de Querétaro, Qro, México.

## Physiochemical characterization

The morphological and structural characterization of the samples was carried out using scanning electron microscopy (SEM) and scanning/transmission electron microscopy (STEM). SEM images were obtained using a Hitachi SU8230 cold field emission (CFE) SEM/STEM microscope at 30 keV accelerating voltage at a distance of 8 mm with the Z contrast STEM.

### Scanning transmission electron microscopy (STEM)

The particle size of the materials is an essential parameter for the modified Laviron equation to determine the oxidation current. For the Pd/C catalyst, the micrographs show nanoparticles with a quasi-spherical morphology (Fig. 1a). Furthermore, the particle size presents values around 3 nm according to the histogram obtained (Fig. 1c). The Cu@Pd/C catalyst also shows semi-spherical morphology (Fig. 1b). The particle size is around 5 nm (Fig. 1d). The modified Laviron equation considers a spherical shape for the particles, and those results are according to our suggestion.

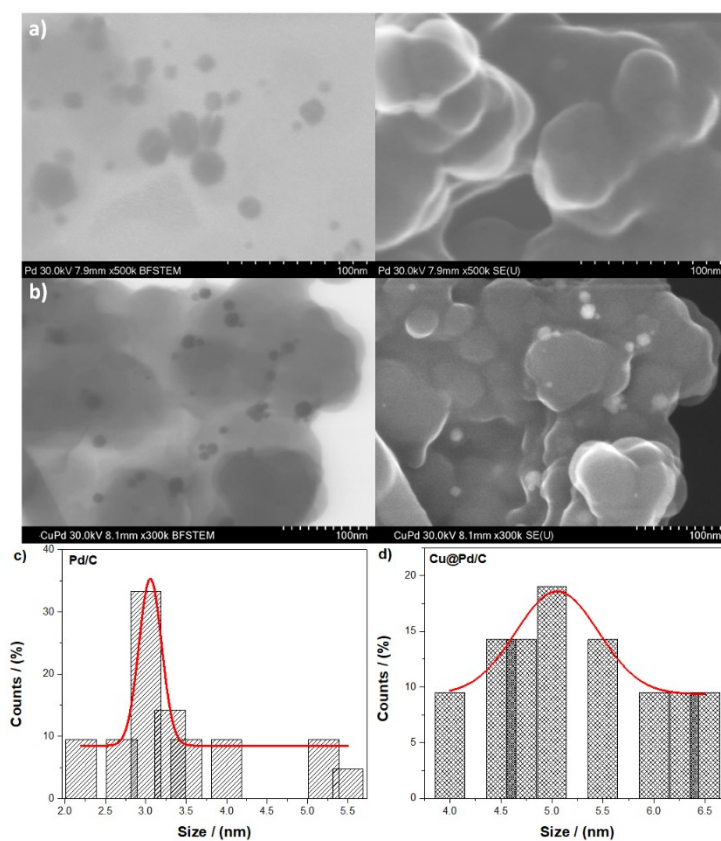

Figure S1.- Micrographs for the a) Pd/C and b) Cu@Pd/C catalysts and their histogram of particle size for the c) Pd/C and d) Cu@Pd/C, respectively.

Table S1.- Numerical results for the parameters of Laviron and modified Laviron equation.

| Sample  | Conc.<br>(M) | Laviron equation       |          | Modified Laviron equation |                         |          |
|---------|--------------|------------------------|----------|---------------------------|-------------------------|----------|
|         |              | $\Gamma_0$             | $\alpha$ | $\Gamma_0$                | $K_{eq}$                | $\alpha$ |
| Pd/C    | 0.5          | 5.26x10 <sup>-8</sup>  | 0.8024   | 5.234x10 <sup>-8</sup>    | 8.056x10 <sup>-8</sup>  | 0.8024   |
|         | 0.8          | 8.92x10 <sup>-8</sup>  | 0.8335   | 8.873x10 <sup>-8</sup>    | 8.537x10 <sup>-8</sup>  | 0.8335   |
|         | 1            | 1.138x10 <sup>-7</sup> | 0.8430   | 1.131x10 <sup>-7</sup>    | 8.706x10 <sup>-8</sup>  | 0.8430   |
|         | 1.2          | 1.439x10 <sup>-7</sup> | 0.8512   | 1.43x10 <sup>-7</sup>     | 9.173x10 <sup>-8</sup>  | 0.8512   |
|         | 1.5          | 1.739x10 <sup>-7</sup> | 0.8606   | 1.728x10 <sup>-7</sup>    | 8.867x10 <sup>-8</sup>  | 0.8606   |
|         | 1.75         | 1.766x10 <sup>-7</sup> | 0.8629   | 1.755x10 <sup>-7</sup>    | 7.717x10 <sup>-8</sup>  | 0.8629   |
| Cu@Pd/C | 0.5          | 3.551x10 <sup>-8</sup> | 0.7724   | 3.55x10 <sup>-8</sup>     | 2.012x10 <sup>-7</sup>  | 0.7724   |
|         | 0.8          | 1.483x10 <sup>-7</sup> | 0.8507   | 1.483x10 <sup>-7</sup>    | 5.252x10 <sup>-7</sup>  | 0.8507   |
|         | 1            | 1.244x10 <sup>-7</sup> | 0.8030   | 1.233x10 <sup>-7</sup>    | 3.5x10 <sup>-7</sup>    | 0.8030   |
|         | 1.2          | 2.098x10 <sup>-7</sup> | 0.8544   | 2.098x10 <sup>-7</sup>    | 4.953x10 <sup>-7</sup>  | 0.8544   |
|         | 1.5          | 2.162x10 <sup>-7</sup> | 0.8504   | 2.162x10 <sup>-7</sup>    | 4.082x10 <sup>-7</sup>  | 0.8504   |
|         | 1.75         | 2.477x10 <sup>-7</sup> | 0.8674   | 2.477x10 <sup>-7</sup>    | 4.0095x10 <sup>-7</sup> | 0.8674   |

Table S2.- Experimental parameters for feeding the iteration program for the electro-oxidation of ethanol.

| Sample  | Conc. (M) | Electron number | Sweep velocity (mV s <sup>-1</sup> ) | Half-peak potential (V) | Half-peak current (A) | Peak potential (V) | Peak current (A) |
|---------|-----------|-----------------|--------------------------------------|-------------------------|-----------------------|--------------------|------------------|
| Pd/C    | 0.5       | 12              | 20                                   | -0.1288                 | 0.001535              | 0.0815             | 0.00343          |
|         | 0.8       | 12              | 20                                   | -0.1016                 | 0.0022                | 0.1472             | 0.0049           |
|         | 1         | 12              | 20                                   | -0.0749                 | 0.00277               | 0.1792             | 0.00589          |
|         | 1.2       | 12              | 20                                   | -0.0676                 | 0.00299               | 0.2232             | 0.007058         |
|         | 1.5       | 12              | 20                                   | -0.05794                | 0.00326               | 0.2611             | 0.00799          |
|         | 1.75      | 12              | 20                                   | -0.0493                 | 0.003256              | 0.2751             | 0.007979         |
| Cu@Pd/C | 0.5       | 12              | 20                                   | -0.1334                 | 0.00128               | 0.0394             | 0.00267          |
|         | 0.8       | 12              | 20                                   | -0.0205                 | 0.00338               | 0.250              | 0.00730          |
|         | 1         | 12              | 20                                   | -0.0718                 | 0.00363               | 0.1381             | 0.00809          |
|         | 1.2       | 12              | 20                                   | -0.0178                 | 0.00444               | 0.2704             | 0.01007          |
|         | 1.5       | 12              | 20                                   | -0.0166                 | 0.004806              | 0.259              | 0.01066          |
|         | 1.75      | 12              | 20                                   | 0.0198                  | 0.00498               | 0.326              | 0.01082          |
